# Supplementary material for: Self-Perceived Moral Competence Among Healthcare Students in Slovakia: A Cross- Sectional Study
Source: Research Square preprint supplement (doi:10.21203/rs.3.rs-7405565/v1), 2025-09-04
Supplement: Supplementary file 1 [file 0b55054758d1c48eed653489.docx]

Table 2 The values C-score and statistic analyses

| **Characteristics** | **n** | **C-score Mean**  **(± SD)** | **Mean Rank** | **Statistic Values** |
| --- | --- | --- | --- | --- |
| **Gender** |  |  |  | U Mann-Withney 11901.000  Z -1.787  *p=0.074* |
| Male | 105 | 16.10 ± 2.54 | 196.23 |
| Female | 255 | 18.21 ± 12.47 | 174.67 |
| **Study program** |  |  |  |  |
| Dental medicine | 141 | 17.26 ± 11.42 | 191.76 | Kruskal-Wallis test 0.442  df = 4  *p=0.778* |
| General medicine | 126 | 16.24 ± 12.96 | 173.84 |
| Nursing | 55 | 15.35 ± 12.75 | 165.70 |
| Physiotherapy | 28 | 18.64 ± 14.03 | 194.64 |
| Public health | 11 | 17.33 ± 17.21 | 166.86 |
| **Years of study** |  |  |  |  |
| first | 37 | 17.71 ± 14.76 | 180.38 | Kruskal-Wallis test 0.400  df = 2  *p=0.819* |
| second | 241 | 16.67 ± 11.94 | 183.22 |
| third | 83 | 16.42 ± 13.27 | 174.83 |
| **Nationality** |  |  |  |  |
| Students from Slovakia | 218 | 15.80 ± 12.66 | 170.61 | U Mann-Withney 13322.500  Z – 2.335  *p = 0.020** |
| International students studying in English | 143 | 18.12 ± 12.24 | 196.84 |
| note p < .05 SD - Standard Deviation | | | | |
