# Supplementary material for: Self-Perceived Moral Competence Among Healthcare Students in Slovakia: A Cross- Sectional Study
Source: Research Square preprint supplement (doi:10.21203/rs.3.rs-7405565/v1), 2025-09-04
Supplement: Supplementary file 2 [file 1d9ac135a9faaff6b07abde1.docx]

**Table 1** Demographic characteristics of the participants

| **Gender n (%)** | Male | 106 | 29.4 |
| --- | --- | --- | --- |
|  | Female | 255 | 70.6 |
| **Academic years n (%)** | first | 37 | 10.3 |
|  | second | 241 | 66.8 |
|  | third | 83 | 22.9 |
| **Study program n (%)** | Dental medicine | 141 | 39.1 |
|  | General medicine | 126 | 34.9 |
|  | Nursing | 55 | 15.2 |
|  | Physiotherapy | 28 | 7.8 |
|  | Public health | 11 | 3.0 |
| **Students' nationality n (%)** | Students from Slovakia | 218 | 60.4 |
|  | International students studying in English | 143 | 39.6 |
