# Supplementary material for: Self-Perceived Moral Competence Among Healthcare Students in Slovakia: A Cross- Sectional Study
Source: Research Square preprint supplement (doi:10.21203/rs.3.rs-7405565/v1), 2025-09-04
Supplement: Supplementary file 3 [file b30321e3650438a774e0c723.docx]

**Table** **3** Moral competence scores with respect to field of study medical and non-medical programs

| **Workers´ dilemma** | **Study program** | **n** | **C-score**  **Mean ±** **SD** | **Mean Rank** | U Mann-Withney Z p |
| --- | --- | --- | --- | --- | --- |
| Non-medical study programs | 94 | 41.86 ± 19.14 | 187.83 | 11455.00 -0.959 *0.337*  46435.00 |
| Medical study programs | 267 | 39.83 ± 20.30 | 175.89 |
| **Doctors´ dilemma** | Non-medical study programs | 94 | 24.95 ± 18.65 | 181.30 | 1179.500 -0.358    46510.500  *0.720* |
| Medical study programs | 267 | 24.60 ± 19.64 | 176.85 |
